# Supplementary material for: Heat-related mortality trends under recent climate warming in Spain: A 36-year observational study
Source: PubMed Central journal article supplement (PMC6057624; doi:10.1371/journal.pmed.1002617), 2018-07-24

# S1 Fig. Sensitivity analysis for modelling choices

## A. Knots for exposure-response

Men

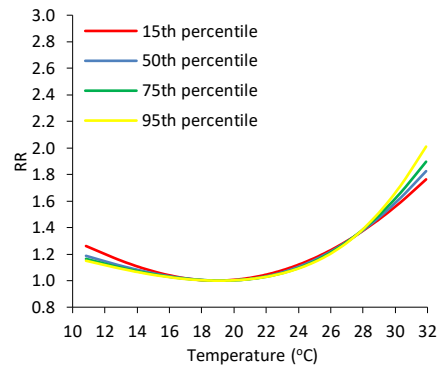

Women

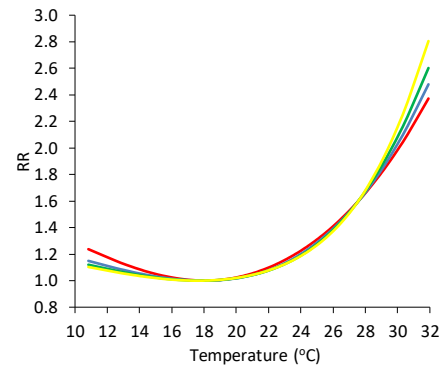

Overall

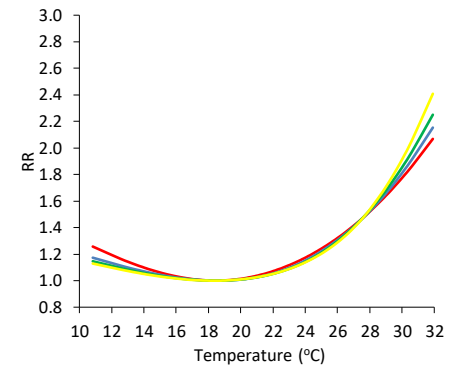

## B. Lag-period

Men

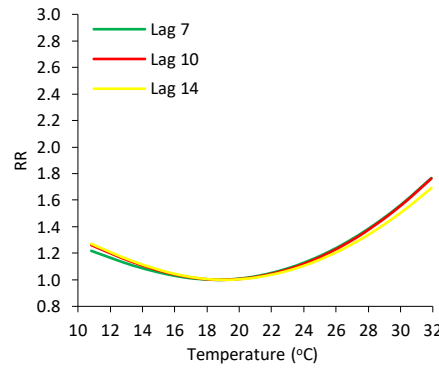

Women

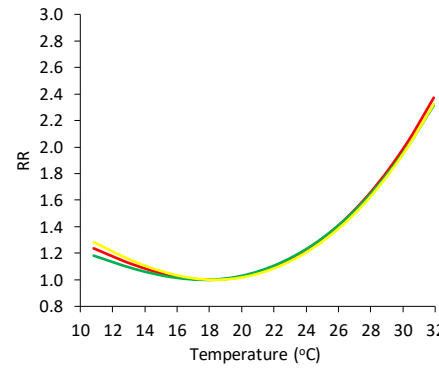

Overall

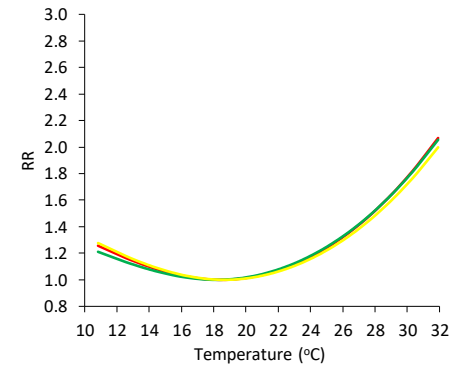

## C. Degrees of freedom for seasonal trend

Men

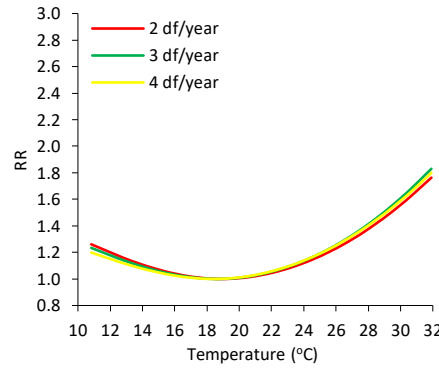

Women

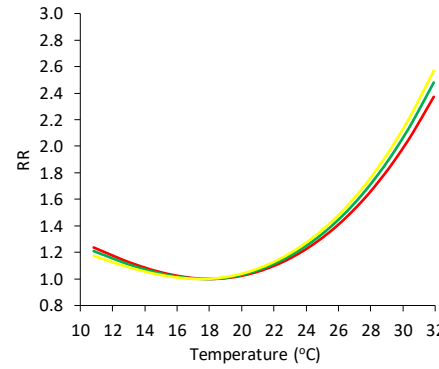

Overall

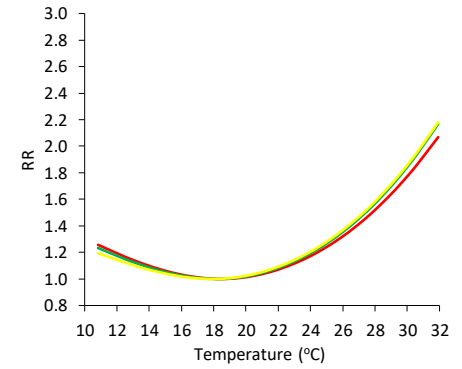

## D. Degrees of freedom for long-term trend

Men

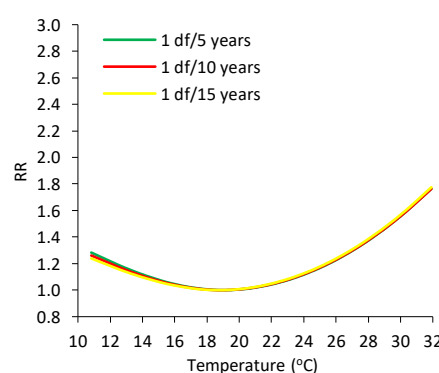

Women

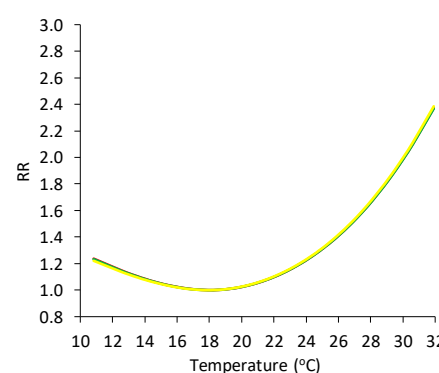

Overall

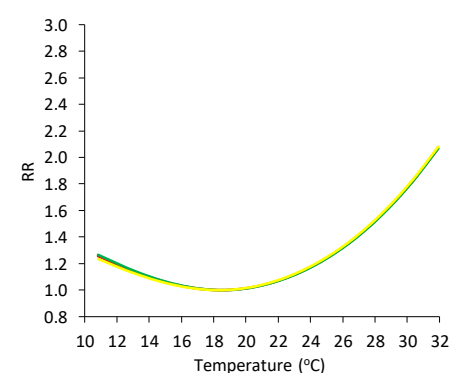

Supplement: pmed.1002617.s002.pdf [file pmed.1002617.s002.pdf]
