# Supplementary material for: Heat-related mortality trends under recent climate warming in Spain: A 36-year observational study
Source: PubMed Central journal article supplement (PMC6057624; doi:10.1371/journal.pmed.1002617), 2018-07-24

**S8 Fig. Temporal evolution of mortality attributable to moderate and extreme heat for 1980-2015**

**A. Circulatory disease**

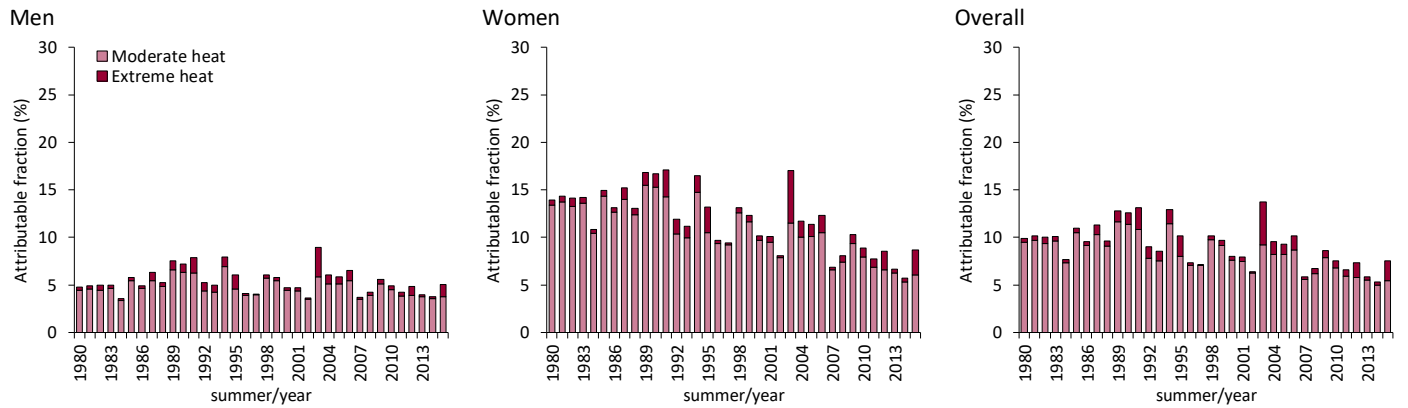

**B. Respiratory disease**

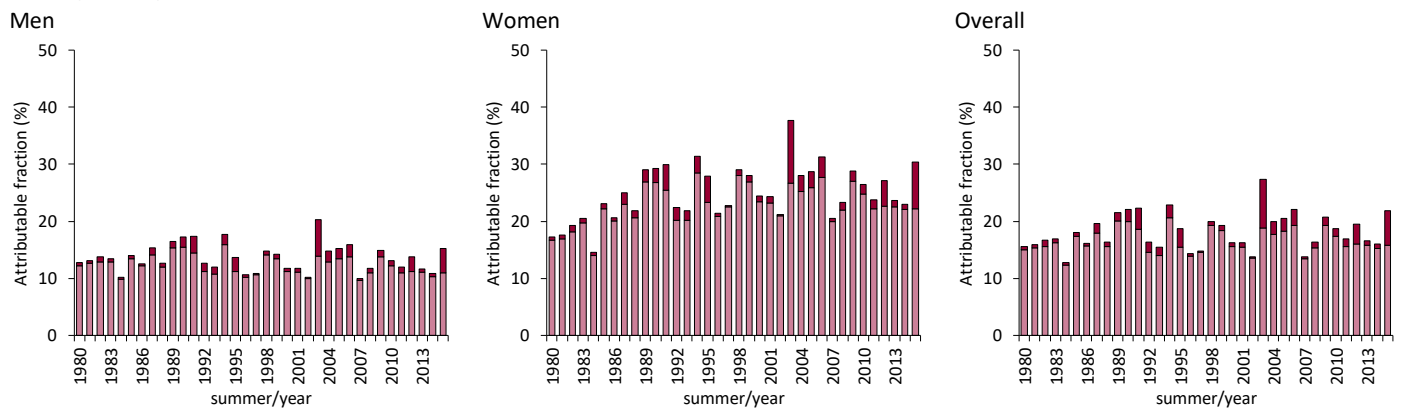

**C. Circulatory and respiratory diseases**

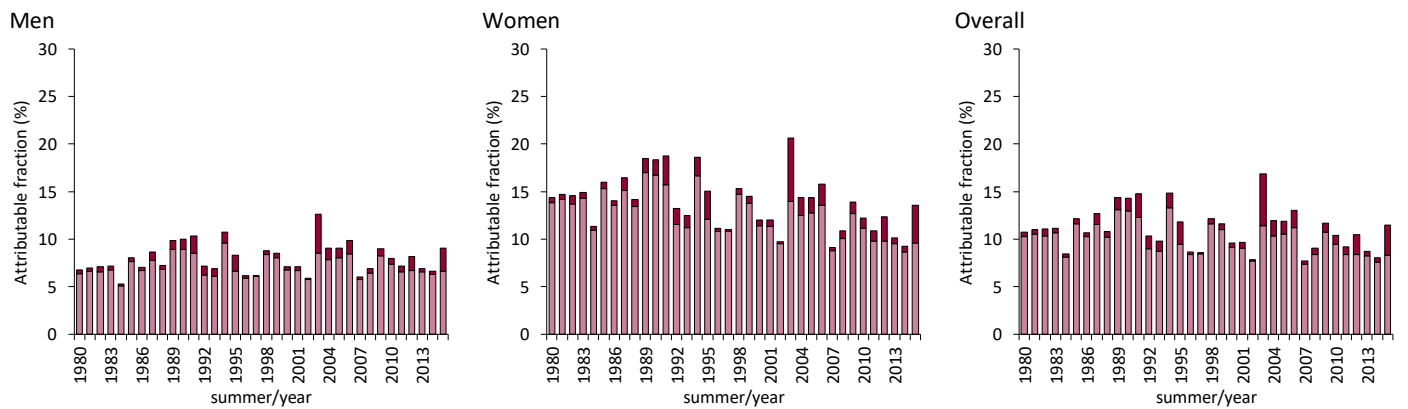

Supplement: pmed.1002617.s009.pdf [file pmed.1002617.s009.pdf]
